# Supplementary material for: Immunotherapy Strategy for Systemic Autoimmune Diseases: Betting on CAR-T Cells and Antibodies
Source: MDPI journal article supplement (doi:10.3390/antib13010010), 2024-02-01
Supplement: s1 [file s1]

Table S1. List of biologics already approved by the FDA for the treatment of SLE, SSc and RA.

| <b>Agent</b>              | <b>Action cells</b>                                                                                                                                                                                                                | <b>Disease</b> | <b>Date of FDA approval</b> | <b>Clinical trials code / Reference number</b> |
|---------------------------|------------------------------------------------------------------------------------------------------------------------------------------------------------------------------------------------------------------------------------|----------------|-----------------------------|------------------------------------------------|
| <b><i>Belimumab</i></b>   | Anti-BAFF, IgG1 moAb that specifically binds to the soluble form of human B-cell-stimulating protein                                                                                                                               | SLE            | 2011                        | NCT04956484<br>NCT01597492<br>NCT01632241      |
| <b><i>Anifrolumab</i></b> | MoAb, Anti-IFN- $\alpha$ receptor                                                                                                                                                                                                  | SLE            | 2021                        | NCT02794285<br>NCT02446899<br>NCT02446912      |
| <b><i>Rituximab</i></b>   | Chimeric anti-CD20 moAb. Eliminates B cells, and a subset of T cells                                                                                                                                                               | RA             | 2006                        | NCT02731560<br>NCT05116228                     |
| <b><i>Abatacept</i></b>   | Protein, CTLA4-Ig construct. CD80/86 costimulation inhibitor, selectively modulates a key co-stimulatory signal for the full activation of T lymphocytes expressing CD28. Inhibits activated Tcells, and antigen-presenting cells. | RA             | 2005                        | NCT03882008<br>NCT01758198<br>NCT03492658      |
| <b><i>Tocilizumab</i></b> | moAb against IL-6R. Inhibits B cell differentiation, M2 macrophages, TH17 polarization, and myofibroblast activation                                                                                                               | RA             | 2010                        | NCT02659150<br>NCT02010216<br>NCT01120366      |
| <b><i>Sarilumab</i></b>   | human anti-IL-6R moAb                                                                                                                                                                                                              | RA             | 2017                        | NCT03449758                                    |
| <b><i>Anakinra</i></b>    | IL-1 inhibitor, it's a recombinant and slightly modified version of the human interleukin 1 receptor antagonist protein                                                                                                            | RA             | 2001                        | NCT02236481                                    |

|                           |                                                                         |    |      |                                                          |
|---------------------------|-------------------------------------------------------------------------|----|------|----------------------------------------------------------|
| <i>Adalimumab</i>         | moAb, works by inactivating tumor necrosis factor-alpha (TNF $\alpha$ ) | RA | 2002 | NCT01270087<br>NCT00234897                               |
| <i>Infliximab</i>         | chimeric human-mouse anti-(TNF $\alpha$ ) moAb                          | RA | 1998 | NCT02770794<br>NCT00246064                               |
| <i>Certolizumab pegol</i> | Fragment of moAb, anti-(TNF $\alpha$ )                                  | RA | 2009 | NCT00580840                                              |
| <i>Etanercept</i>         | It's a fusion protein produced by recombinant DNA, TNF inhibitor        | RA | 1998 | NCT00913458<br>NCT00768053<br>NCT00099554<br>NCT01783015 |
| <i>Golimumab</i>          | Anti-TNF $\alpha$ human moAb                                            | RA | 2009 | NCT01295151<br>NCT03100253                               |

Table S2. Biologic drugs for treating SLE, SSc and RA that are currently under clinical trials

| Agent                             | Action, Cells                                                    | Disease | Phase of trial | Clinical trials code       |
|-----------------------------------|------------------------------------------------------------------|---------|----------------|----------------------------|
| <b>B-cell activity inhibitors</b> |                                                                  |         |                |                            |
| <i>Blisibimod</i>                 | Anti-BAFF fusion protein consisting of four BAFF binding domains | SLE     | III            | NCT01395745<br>NCT02514967 |
| <i>Obexelimab (XmAb5871)</i>      | BSAb, targeting CD19 and Fc $\gamma$ RIIb on B cells             | SLE     | II             | NCT02725515                |
| <i>Epratuzumab</i>                | Anti-CD22 human moAb                                             | SLE     | III            | NCT01262365<br>NCT01408576 |

|                                         |                                                                                                                                                                                    |     |     |                            |
|-----------------------------------------|------------------------------------------------------------------------------------------------------------------------------------------------------------------------------------|-----|-----|----------------------------|
|                                         |                                                                                                                                                                                    |     |     | NCT00383214<br>NCT00111306 |
| <b><i>Obinutuzumab</i></b>              | Human anti CD20 moAb                                                                                                                                                               | SLE | III | NCT04963296                |
| <b><i>Mosunetuzumab</i></b>             | BsAb, binds CD20 and CD3 to engage T-cells                                                                                                                                         | SLE | I   | NCT05155345                |
| <b><i>PRV-3279</i></b>                  | Fv specific BsAb, simultaneously ligate the inhibitory molecule CD32B (FcγRIIb) with the B-cell receptor component CD79B on B cells                                                | SLE | II  | NCT05087628                |
| <b><i>Telitacicept</i></b>              | Fully human TACI-Fc fusion protein that targets B lymphocyte stimulator (BLyS) and a proliferating-inducing ligand (APRIL)                                                         | SLE | IV  | NCT05899907                |
| <b><i>Ocrelizumab</i></b>               | Anti CD20 moAb                                                                                                                                                                     | SLE | III | NCT00539838<br>NCT00626197 |
| <b><i>Abetimus</i></b>                  | It is made of four double-stranded oligodeoxyribonucleotides that are attached to a carrier platform and are designed to block specific B-cell anti double stranded DNA antibodies | SLE | III | NCT00089804<br>NCT00035308 |
| <b><i>Rozibafusp Alfa (AMG-570)</i></b> | BsAb, targeting inducible costimulator ligand (ICOSL) and B cell activating factor (BAFF)                                                                                          | SLE | II  | NCT04058028                |
|                                         |                                                                                                                                                                                    | RA  | I   | NCT03156023                |
| <b><i>Ianalumab</i></b>                 | MoAb, anti-BAFFR                                                                                                                                                                   | SLE | III | NCT05639114<br>NCT05624749 |
|                                         |                                                                                                                                                                                    | RA  | I   | NCT03574545                |
| <b><i>Atacicept</i></b>                 | Recombinant fusion protein, anti-BLyS and APRIL                                                                                                                                    | SLE | III | NCT00624338                |
|                                         |                                                                                                                                                                                    | RA  | II  | NCT00430495<br>NCT00595413 |
| <b><i>Tabalumab</i></b>                 | Anti-BAFF moAb                                                                                                                                                                     | SLE | III | NCT02041091                |

|                                                |                                                                                                      |     |        |                                           |
|------------------------------------------------|------------------------------------------------------------------------------------------------------|-----|--------|-------------------------------------------|
|                                                |                                                                                                      | RA  | III    | NCT01676701<br>NCT01202760                |
| <b><i>Rituximab</i></b>                        | Chimeric anti-CD20 moAb. Eliminates B cells, and a subset of T cells                                 | SLE | IV     | NCT05828147                               |
|                                                |                                                                                                      | SSc | III    | NCT01748084<br>NCT04274257                |
| <b><i>Brentuximab vedotin</i></b>              | Anti-CD30 moAb                                                                                       | SLE | II     | NCT02533570                               |
|                                                |                                                                                                      | SSc | III    | NCT03222492<br>NCT03198689                |
| <b><i>Inebilizumab</i></b>                     | anti-CD19 monoclonal antibody                                                                        | SSc | III    | NCT05198557                               |
| <b><i>Belimumab</i></b>                        | Anti-BAFF, IgG1 moAb that specifically binds to the soluble form of human B-cell-stimulating protein | SSc | II/III | NCT05878717<br>NCT0384406<br>NCT01670565  |
| <b>T-cell or T-cell co-stimulator blockers</b> |                                                                                                      |     |        |                                           |
| <b><i>Itolizumab</i></b>                       | Anti-CD6 moAb                                                                                        | SLE | I      | NCT04128579                               |
| <b><i>Iscalimab</i></b>                        | Anti-CD40 moAb                                                                                       | SLE | II     | NCT03656562                               |
| <b><i>Milatuzumab</i></b>                      | Anti-CD74 moAb                                                                                       | SLE | I      | NCT01845740                               |
| <b><i>Lulizumab pegol</i></b>                  | Anti-CD28 moAb                                                                                       | SLE | II     | NCT02265744                               |
| <b><i>Acazicolcept</i></b>                     | Anti-CD28 and ICOS BsAb                                                                              | SLE | II     | NCT04835441                               |
| <b><i>LY3361237</i></b>                        | Agonist moAb to the checkpoint inhibitory receptor BTLA (B and T lymphocyte attenuator)              | SLE | II     | NCT03933943                               |
| <b><i>Dapirolizumab pegol</i></b>              | Anti-CD40L moAb                                                                                      | SLE | III    | NCT04294667                               |
| <b><i>Dazodalibep (VIB4920)</i></b>            | anti-CD40 ligand-Tn3 fusion protein                                                                  | SLE | II     | NCT02804763                               |
|                                                |                                                                                                      | RA  | II     | NCT04163991<br>NCT02780388<br>NCT04129164 |

|                                                |                                                                                                                                                                                                                                    |     |        |                            |
|------------------------------------------------|------------------------------------------------------------------------------------------------------------------------------------------------------------------------------------------------------------------------------------|-----|--------|----------------------------|
| <b>BI655064</b>                                | Anti-CD40 moAb                                                                                                                                                                                                                     | SLE | II     | NCT03385564<br>NCT02770170 |
|                                                |                                                                                                                                                                                                                                    | RA  | I      | NCT01751776                |
| <b>Abatacept</b>                               | Protein, CTLA4-Ig construct. CD80/86 costimulation inhibitor, selectively modulates a key co-stimulatory signal for the full activation of T lymphocytes expressing CD28. Inhibits activated Tcells, and antigen-presenting cells. | SLE | III    | NCT00430677                |
|                                                |                                                                                                                                                                                                                                    | SSc | II     | NCT00442611<br>NCT02161406 |
| <b>Romilkimab</b>                              | BsAb against IL-4/IL-13 cytokines, which are derived from Th2 cells, mast cells eosinophils, innate lymphoid cells. Inhibits M2 macrophages, and myofibroblasts.                                                                   | SSc | II     | NCT02921971                |
| <b>Theralizumab (TAB08)</b>                    | anti-CD28 moAb                                                                                                                                                                                                                     | RA  | II     | NCT01990157                |
| <b>Targeting cytokine or cytokine receptor</b> |                                                                                                                                                                                                                                    |     |        |                            |
| <b>Sifalimumab</b>                             | Anti-IFN- $\alpha$ moAb                                                                                                                                                                                                            | SLE | II     | NCT00979654<br>NCT01283139 |
| <b>Rontalizumab</b>                            | Anti-IFN- $\alpha$ moAb                                                                                                                                                                                                            | SLE | II     | NCT00962832                |
| <b>JNJ-55920839</b>                            | Anti-IFN- $\alpha$ moAb                                                                                                                                                                                                            | SLE | I      | NCT02609789                |
| <b>IFN-<math>\alpha</math> kinoid</b>          | A therapeutic vaccine composed of IFN $\alpha$ 2b coupled to a carrier protein                                                                                                                                                     | SLE | II     | NCT02665364                |
| <b>BT-063</b>                                  | Anti-IL-10 moAb                                                                                                                                                                                                                    | SLE | II     | NCT02554019                |
| <b>Vunakizumab (SHR1314)</b>                   | Anti-IL17A moAb                                                                                                                                                                                                                    | SLE | II     | NCT04924296                |
| <b>Avizakimab (BOS161721)</b>                  | Anti-IL21 moAb                                                                                                                                                                                                                     | SLE | II     | NCT03371251                |
| <b>Infliximab</b>                              | Chimeric human-mouse anti-(TNF $\alpha$ ) moAb                                                                                                                                                                                     | SLE | II/III | NCT00368264                |

|                                    |                                                                                                                                          |     |     |                                           |
|------------------------------------|------------------------------------------------------------------------------------------------------------------------------------------|-----|-----|-------------------------------------------|
|                                    |                                                                                                                                          |     |     |                                           |
| <b><i>Etanercept</i></b>           | It's a fusion protein produced by recombinant DNA, TNF inhibitor                                                                         | SLE | II  | NCT02656082                               |
| <b><i>Ustekinumab</i></b>          | MoAb that binds to the p-40 subunit of both IL-12 and IL-23 so that they subsequently cannot bind to their receptors to activate T-cells | SLE | III | NCT03517722                               |
|                                    |                                                                                                                                          | RA  | II  | NCT01645280                               |
| <b><i>Secukinumab</i></b>          | anti-IL17A moAb                                                                                                                          | SLE | III | NCT05232864<br>NCT04181762                |
|                                    |                                                                                                                                          | RA  | III | NCT01770379<br>NCT01377012<br>NCT01350804 |
| <b><i>ALX-0061</i></b>             | anti-IL-6R BsAb                                                                                                                          | SLE | II  | NCT02437890                               |
|                                    |                                                                                                                                          | RA  | II  | NCT02518620<br>NCT01284569                |
| <b><i>Guselkumab</i></b>           | anti-IL23 moAb                                                                                                                           | SLE | II  | NCT04376827                               |
|                                    |                                                                                                                                          | SSc | II  | NCT01645280                               |
| <b><i>Tocilizumab</i></b>          | moAb against IL-6R. Inhibits B cell differentiation, M2 macrophages, TH17 polarization, and myofibroblast activation                     | SLE | I   | NCT05835986                               |
|                                    |                                                                                                                                          | SSc | III | NCT01532869<br>NCT02453256<br>NCT05963048 |
| <b><i>Brodalumab (KHK4827)</i></b> | anti-IL17A moAb                                                                                                                          | SSc | III | NCT03957681                               |
| <b><i>Bermekimab</i></b>           | anti-IL-1a mAb                                                                                                                           | SSc | II  | NCT04045743                               |
| <b><i>Nemolizumab</i></b>          | anti-IL-31 mAb                                                                                                                           | SSc | II  | NCT05214794                               |
| <b><i>Fresolimumab</i></b>         | anti-TGFβ mAb                                                                                                                            | SSc | I   | NCT01284322                               |

|                                                         |                                                                                                    |     |     |                                           |
|---------------------------------------------------------|----------------------------------------------------------------------------------------------------|-----|-----|-------------------------------------------|
| <i>Sirukumab</i>                                        | anti-IL-6 moAb                                                                                     | RA  | III | NCT01856309<br>NCT02019472                |
| <i>Clazakizumab</i>                                     | anti-IL-6 moAb                                                                                     | RA  | II  | NCT02015520                               |
| <i>Olokizumab</i>                                       | anti-IL-6 moAb                                                                                     | RA  | III | NCT02760433<br>NCT02760368<br>NCT03120949 |
| <i>Anifrolumab</i>                                      | MoAb, Anti-IFN- $\alpha$ receptor                                                                  | SSc | III | NCT05925803                               |
|                                                         |                                                                                                    | RA  | II  | NCT01438489                               |
| Drugs targeting the plasmacytoid dendritic cells (pDCs) |                                                                                                    |     |     |                                           |
| <i>Litifilimab</i>                                      | Anti-BDCA2 (Blood dendritic cell antigen 2) moAb                                                   | SLE | II  | NCT02847598                               |
| <i>Daxdilimab</i>                                       | Anti-Immunoglobulin-Like Transcript (ILT)-7 moAb, which specifically induces the depletion of pDCs | SLE | II  | NCT04925934                               |

Table S3. Common biologic agents used to treat SLE, SSc, and RA

| Agent            | Action, Cells                                                                                                                                                                                                                       | Lupus     | Sclerosis | RA                                     |
|------------------|-------------------------------------------------------------------------------------------------------------------------------------------------------------------------------------------------------------------------------------|-----------|-----------|----------------------------------------|
| <i>Rituximab</i> | Chimeric anti-CD20 moAb. Eliminates B cells, and a subset of T cells                                                                                                                                                                | Phase IV  | Phase III | Phase IV<br>Approved by<br>FDA in 2006 |
| <i>Abatacept</i> | Protein, CTLA4-Ig construct. CD80/86 costimulation inhibitor, selectively modulates a key co-stimulatory signal for the full activation of T lymphocytes expressing CD28. Inhibits activated T cells, and antigen-presenting cells. | Phase III | Phase II  | Phase IV<br>Approved by<br>FDA in 2005 |

|                    |                                                                                                                            |                                         |           |                                        |
|--------------------|----------------------------------------------------------------------------------------------------------------------------|-----------------------------------------|-----------|----------------------------------------|
| <i>Anifrolumab</i> | MoAb, Anti-IFN- $\alpha$ receptor                                                                                          | Phase III<br>Approved by<br>FDA in 2021 | Phase III | Phase II                               |
| <i>Tocilizumab</i> | moAb against IL-6R. Inhibits B cell<br>differentiation, M2 macrophages, TH17<br>polarization, and myofibroblast activation | Phase I                                 | Phase III | Phase IV<br>Approved by<br>FDA in 2010 |
